# Supplementary material for: Expansion of the enzymatic repertoire of the CAZy database to integrate auxiliary redox enzymes
Source: PubMed Central journal article supplement (PMC3620520; doi:10.1186/1754-6834-6-41), 2013-03-21
Supplement: 1754-6834-6-41-S1.pdf [file 1754-6834-6-41-S1.pdf]

**Supplemental data S1. Number of AA proteins in the 41 selected fungal genomes.**

|                                    | AA1_1 | AA1_2 | AA1_3 | AA2 | AA3_1 | AA3_2 <sup>a</sup> | AA3_3 | AA3_4 | AA4 | AA5_1 | AA5_2 | AA6 | AA7 | AA8 | AA9 | AA10 |
|------------------------------------|-------|-------|-------|-----|-------|--------------------|-------|-------|-----|-------|-------|-----|-----|-----|-----|------|
| <i>Aspergillus niger</i>           | 0     | 2     | 7     | 0   | 2     | 4                  | 2     | 0     | 1   | 0     | 0     | 1   | 3   | 5   | 7   | 0    |
| <i>Auricularia delicata</i>        | 0     | 1     | 5     | 18  | 1     | 3                  | 6     | 3     | 0   | 8     | 0     | 4   | 2   | 2   | 20  | 0    |
| <i>Botrytis cinerea</i>            | 0     | 1     | 9     | 0   | 4     | 1                  | 2     | 0     | 1   | 2     | 2     | 1   | 1   | 7   | 9   | 0    |
| <i>Ceriporiopsis subvermispora</i> | 7     | 1     | 0     | 16  | 1     | 6                  | 3     | 0     | 0   | 3     | 0     | 0   | 0   | 2   | 9   | 0    |
| <i>Cladosporium fulvum</i>         | 0     | 1     | 10    | 0   | 2     | 1                  | 4     | 0     | 0   | 2     | 1     | 1   | 0   | 3   | 2   | 0    |
| <i>Coniophora puteana</i>          | 6     | 1     | 0     | 0   | 1     | 0                  | 5     | 0     | 0   | 6     | 0     | 2   | 0   | 4   | 10  | 0    |
| <i>Coprinopsis cinerea</i>         | 17    | 0     | 0     | 1   | 1     | 22                 | 2     | 0     | 0   | 6     | 0     | 3   | 2   | 6   | 33  | 0    |
| <i>Cryptococcus neoformans</i>     | 0     | 3     | 0     | 0   | 0     | 0                  | 0     | 0     | 0   | 3     | 0     | 2   | 0   | 0   | 1   | 0    |
| <i>Dacryopinax sp.</i>             | 0     | 2     | 0     | 0   | 0     | 0                  | 1     | 0     | 2   | 3     | 0     | 1   | 3   | 0   | 0   | 0    |
| <i>Dichomitus squalens</i>         | 11    | 1     | 0     | 12  | 1     | 11                 | 4     | 0     | 0   | 9     | 0     | 1   | 4   | 2   | 15  | 0    |
| <i>Dothistroma septosporum</i>     | 0     | 1     | 7     | 0   | 2     | 1                  | 2     | 0     | 1   | 2     | 1     | 1   | 0   | 3   | 2   | 0    |
| <i>Fomitiporia mediterranea</i>    | 10    | 1     | 0     | 17  | 1     | 2                  | 3     | 0     | 0   | 4     | 0     | 3   | 0   | 1   | 13  | 0    |
| <i>Fomitopsis pinicola</i>         | 5     | 1     | 0     | 0   | 0     | 1                  | 4     | 0     | 0   | 4     | 0     | 1   | 5   | 0   | 4   | 0    |
| <i>Ganoderma lucidum</i>           | 13    | 1     | 0     | 8   | 1     | 4                  | 3     | 0     | 0   | 9     | 0     | 1   | 4   | 2   | 15  | 0    |
| <i>Ganoderma sp.</i>               | 16    | 1     | 0     | 9   | 1     | 8                  | 5     | 0     | 0   | 9     | 0     | 2   | 4   | 2   | 16  | 0    |
| <i>Gloeophyllum trabeum</i>        | 4     | 1     | 0     | 0   | 1     | 6                  | 2     | 1     | 3   | 2     | 0     | 3   | 0   | 0   | 4   | 0    |
| <i>Grosmannia clavigera</i>        | 0     | 3     | 4     | 0   | 2     | 0                  | 0     | 0     | 1   | 0     | 0     | 1   | 1   | 2   | 2   | 0    |
| <i>Heterobasidion annosum</i>      | 14    | 1     | 0     | 7   | 1     | 13                 | 3     | 0     | 0   | 5     | 0     | 2   | 3   | 2   | 10  | 0    |
| <i>Laccaria bicolor</i>            | 9     | 3     | 0     | 1   | 0     | 3                  | 2     | 0     | 0   | 11    | 0     | 2   | 1   | 0   | 13  | 0    |
| <i>Malassezia globosa</i>          | 0     | 1     | 0     | 0   | 0     | 0                  | 0     | 0     | 0   | 1     | 0     | 0   | 0   | 0   | 0   | 0    |
| <i>Melampsora laricis-populina</i> | 0     | 1     | 0     | 0   | 0     | 0                  | 1     | 0     | 0   | 4     | 0     | 1   | 10  | 0   | 4   | 0    |
| <i>Myceliophthora thermophila</i>  | 0     | 0     | 2     | 0   | 3     | 0                  | 1     | 0     | 0   | 1     | 0     | 1   | 2   | 7   | 22  | 0    |
| <i>Neurospora crassa</i>           | 0     | 2     | 8     | 0   | 2     | 0                  | 1     | 0     | 0   | 1     | 1     | 1   | 2   | 8   | 14  | 0    |
| <i>Phanerochaete carnosae</i>      | 0     | 1     | 0     | 11  | 1     | 4                  | 4     | 0     | 0   | 6     | 0     | 3   | 0   | 2   | 11  | 0    |
| <i>Phanerochaete chrysosporium</i> | 0     | 1     | 0     | 16  | 1     | 3                  | 3     | 1     | 0   | 7     | 0     | 4   | 0   | 2   | 15  | 0    |

|                                   |    |   |    |    |   |    |   |   |   |   |   |   |   |   |    |   |
|-----------------------------------|----|---|----|----|---|----|---|---|---|---|---|---|---|---|----|---|
| <i>Pichia stipitis</i>            | 0  | 2 | 0  | 0  | 0 | 0  | 0 | 0 | 0 | 0 | 0 | 4 | 0 | 0 | 0  | 0 |
| <i>Podospora anserina</i>         | 0  | 1 | 10 | 0  | 3 | 1  | 2 | 1 | 0 | 1 | 1 | 1 | 2 | 8 | 33 | 0 |
| <i>Postia placenta</i>            | 2  | 1 | 0  | 0  | 0 | 3  | 4 | 0 | 0 | 2 | 0 | 1 | 0 | 0 | 2  | 0 |
| <i>Punctularia strigosozonata</i> | 12 | 1 | 0  | 11 | 1 | 6  | 4 | 1 | 0 | 9 | 0 | 2 | 1 | 1 | 14 | 0 |
| <i>Schizophyllum commune</i>      | 2  | 0 | 0  | 0  | 1 | 2  | 4 | 0 | 0 | 2 | 0 | 4 | 4 | 3 | 22 | 0 |
| <i>Sclerotinia sclerotiorum</i>   | 0  | 1 | 6  | 0  | 3 | 3  | 2 | 0 | 1 | 3 | 1 | 1 | 1 | 5 | 9  | 0 |
| <i>Serpula lacrymans</i>          | 4  | 1 | 0  | 0  | 2 | 0  | 5 | 0 | 0 | 3 | 0 | 2 | 0 | 4 | 5  | 0 |
| <i>Sporobolomyces roseus</i>      | 0  | 1 | 0  | 0  | 0 | 0  | 0 | 0 | 0 | 3 | 0 | 1 | 0 | 0 | 0  | 0 |
| <i>Stagonospora nodorum</i>       | 0  | 1 | 2  | 0  | 4 | 1  | 3 | 0 | 1 | 2 | 1 | 1 | 4 | 5 | 28 | 0 |
| <i>Stereum hirsutum</i>           | 15 | 2 | 0  | 6  | 1 | 15 | 7 | 0 | 0 | 8 | 0 | 1 | 3 | 2 | 16 | 0 |
| <i>Thielavia terrestris</i>       | 0  | 2 | 5  | 0  | 3 | 0  | 1 | 0 | 2 | 1 | 0 | 1 | 2 | 9 | 18 | 0 |
| <i>Trametes versicolor</i>        | 7  | 2 | 0  | 26 | 1 | 5  | 4 | 1 | 0 | 9 | 0 | 1 | 0 | 2 | 18 | 0 |
| <i>Tremella mesenterica</i>       | 0  | 1 | 0  | 0  | 0 | 1  | 0 | 0 | 0 | 2 | 0 | 1 | 0 | 0 | 0  | 0 |
| <i>Trichoderma reesei</i>         | 0  | 2 | 1  | 0  | 0 | 1  | 2 | 0 | 0 | 1 | 0 | 1 | 0 | 2 | 3  | 0 |
| <i>Ustilago maydis</i>            | 0  | 1 | 0  | 0  | 0 | 1  | 0 | 0 | 0 | 3 | 1 | 1 | 0 | 0 | 0  | 1 |
| <i>Wolfiporia cocos</i>           | 3  | 1 | 0  | 0  | 0 | 0  | 5 | 0 | 0 | 4 | 0 | 1 | 0 | 0 | 2  | 0 |

<sup>a)</sup> Putative AAO and GOX are reported.
