# Supplementary material for: Expansion of the enzymatic repertoire of the CAZy database to integrate auxiliary redox enzymes
Source: PubMed Central journal article supplement (PMC3620520; doi:10.1186/1754-6834-6-41), 2013-03-21

# Schematic distribution of ligninolytic AA in fungal genomes

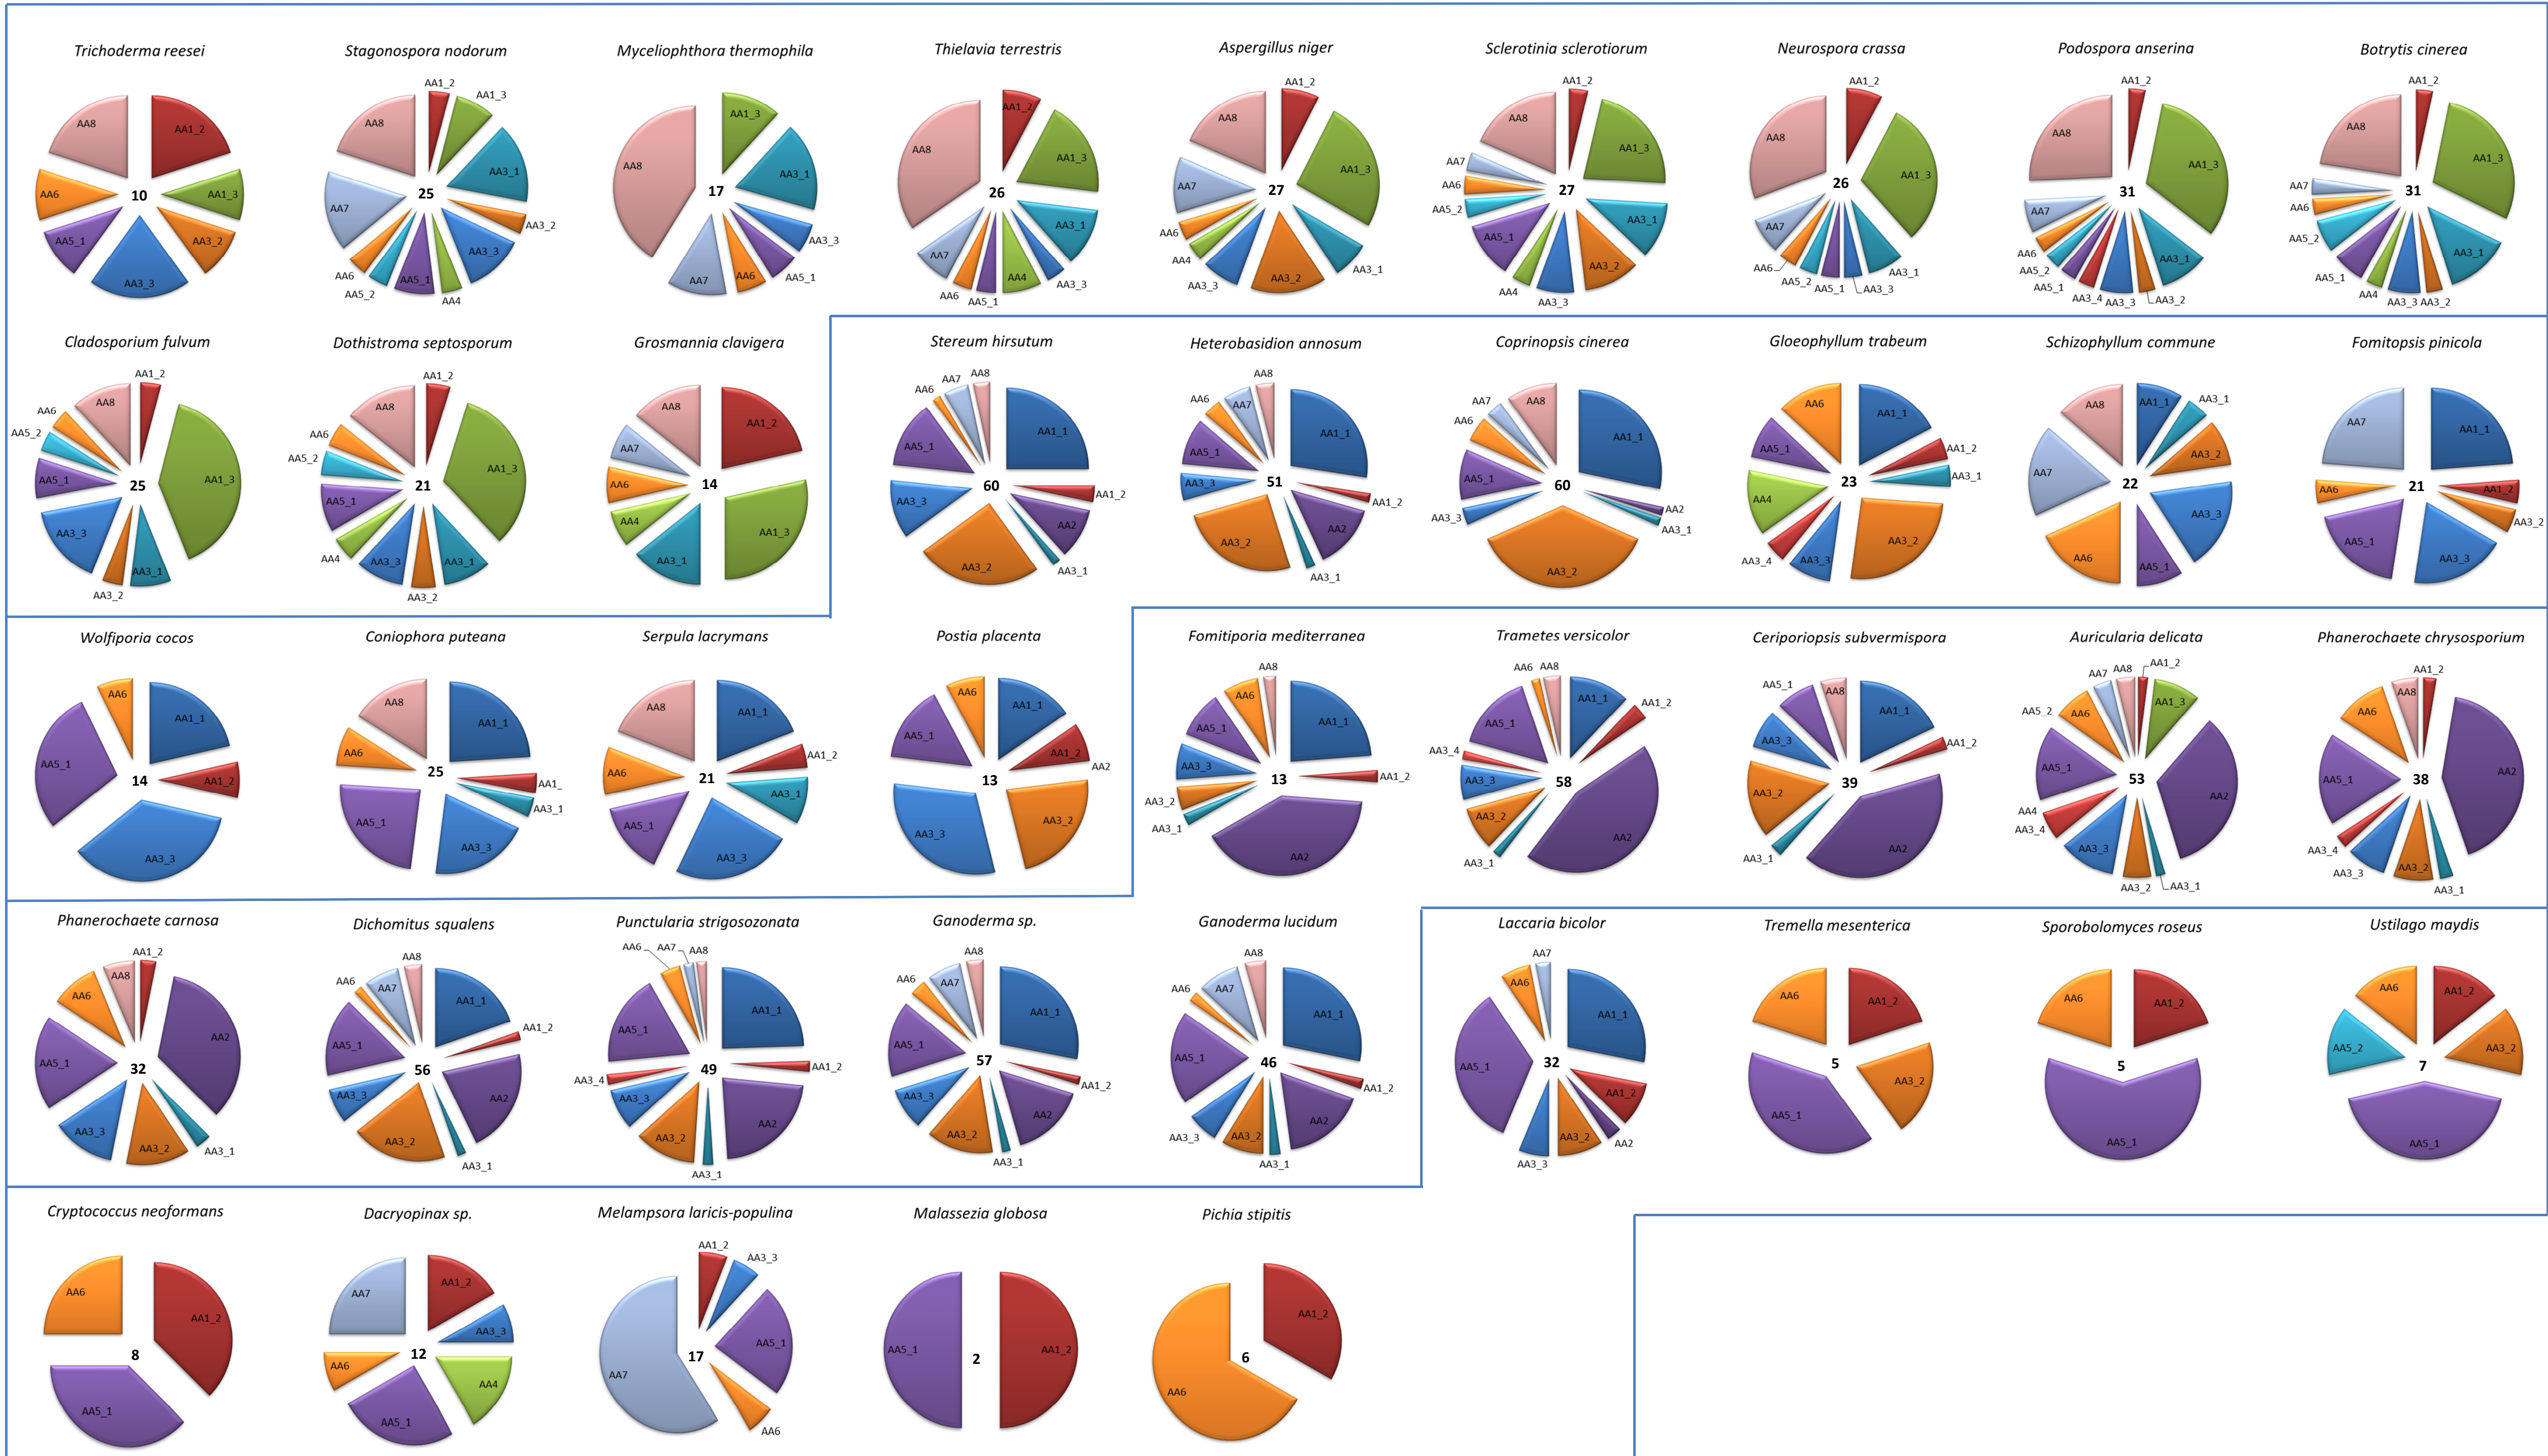

Supplement: 1754-6834-6-41-S3.pdf [file 1754-6834-6-41-S3.pdf]
